# Supplementary material for: Community Drug Distributor Knowledge, Attitudes, and Motivation Surrounding Mass Drug Administration for Soil-Transmitted Helminths in India
Source: PubMed Central journal article supplement (PMC8650093; doi:10.3389/fpubh.2021.714606), 2021-11-23
Supplement: Table_2.pdf [file Table_2.pdf]

**Supplementary file: 2**

| <b>S. No</b>                                           | <b>Questions</b>                                                                                                                                                                                             |
|--------------------------------------------------------|--------------------------------------------------------------------------------------------------------------------------------------------------------------------------------------------------------------|
| <b>Knowledge of STH and cMDA for STH</b>               |                                                                                                                                                                                                              |
| 1.                                                     | What are the types of soil-transmitted helminths?                                                                                                                                                            |
| 2.                                                     | How do these STH infections spread?                                                                                                                                                                          |
| 3.                                                     | What are the signs and symptoms of having intestinal worms?                                                                                                                                                  |
| 4.                                                     | What is the name of the tablet distributed by DeWorm3 study in CWMDA for STH?                                                                                                                                |
| 5.                                                     | Who all can take this tablet that is distributed by DeWorm3 study?                                                                                                                                           |
| 6.                                                     | How many tablets distributed in DeWorm3 study, should be given to a child 1-2 years of age?                                                                                                                  |
| 7.                                                     | How many tablets distributed in DeWorm3 study, should be given to a 4 years old child?                                                                                                                       |
| 8.                                                     | How many tablets distributed in DeWorm3 study, should be given to a person 25 years of age?                                                                                                                  |
| 9.                                                     | Are there any advantages or positive effects of having STH infection?                                                                                                                                        |
| <b>Attitude towards MDA for STH</b>                    |                                                                                                                                                                                                              |
| 10.                                                    | Do you think STH infection is a serious disease?                                                                                                                                                             |
| 11.                                                    | Now you distributed this tablet given by DeWorm3 project house to house. In your opinion, how necessary it is that this tablet should be distributed only house to house?                                    |
| 12.                                                    | In a community-wide mass drug administration for STH program, in your opinion, when a person feels that they do not have intestinal worms then how necessary is it for a person to eat the deworming tablet? |
| 13.                                                    | In your opinion, how important it is to make people eat the tablet only in front of you?                                                                                                                     |
| 14.                                                    | Can a person have intestinal worms even if they do not feel it or it is not visible to them?                                                                                                                 |
| 15.                                                    | STH are minor infections that cause no major harm to the body. To what extent do you agree or disagree with this statement?                                                                                  |
| 16.                                                    | STH mainly affects children and not adults. To what extent do you agree or disagree with this statement?                                                                                                     |
| 17.                                                    | In your opinion, if a person always uses toilet, then how important it is for him/her to make take the tablet when it is distributed to everyone in the community?                                           |
| 18.                                                    | In your opinion, is the tablet for STH infections distributed in DeWorm3 study is an effective drug?                                                                                                         |
| 19.                                                    | In your opinion, is the tablet for STH infections distributed in DeWorm3 study is a safe drug?                                                                                                               |
| 20.                                                    | In your opinion, can STH infections be controlled?                                                                                                                                                           |
| 21.                                                    | In your opinion, can STH infections be eliminated?                                                                                                                                                           |
| <b>Motivation and satisfaction of working as a CDD</b> |                                                                                                                                                                                                              |
| 22.                                                    | To what extent do you like working as a CDD in the DeWorm3 project?                                                                                                                                          |
| 23.                                                    | What do you like about working as a CDD in the DeWorm3 project?                                                                                                                                              |
| 24.                                                    | To work as a CDD in the DeWorm3 project for a community-wide mass drug administration for STH, how confident do you feel?                                                                                    |

|     |                                                                                                                                                                      |
|-----|----------------------------------------------------------------------------------------------------------------------------------------------------------------------|
| 25. | To work as a CDD in the DeWorm3 project for a community-wide mass drug administration for STH, to what extent do you feel that you have the resources and materials? |
| 26. | To what extent are you satisfied or not satisfied by working as a CDD of the DeWorm3 project?                                                                        |
